# Supplementary material for: Electrospray-Based Microencapsulation of Epigallocatechin 3-Gallate for Local Delivery into the Intervertebral Disc
Source: MDPI journal article supplement (doi:10.3390/pharmaceutics11090435), 2019-09-01
Supplement: s1 [file s1]

# Supplementary Materials: Electrospray-Based Microencapsulation of Epigallocatechin 3-Gallate for Local Delivery into the Intervertebral Disc

Moira Loepfe, Anja Duss, Katerina-Alexandra Zafeiropoulou, Oddny Björgvinsdóttir, Matteo D'Este, David Eglin, Giuseppino Fortunato, Juergen Klasen, Stephen J. Ferguson, Karin Wuertz-Kozak and Olga Krupkova

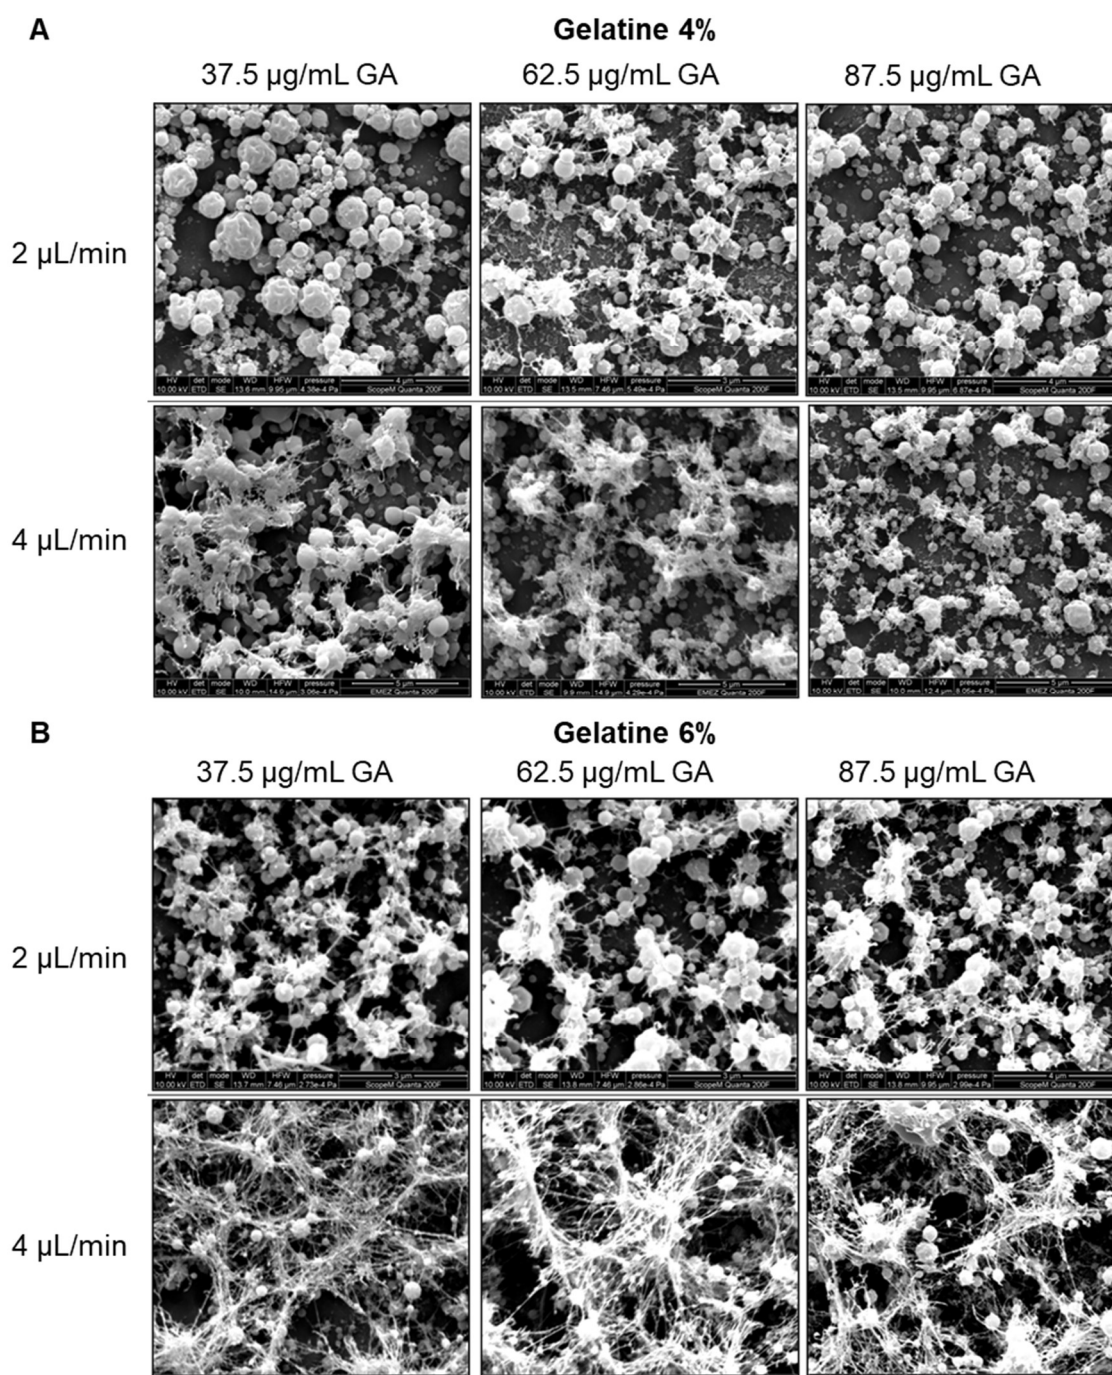

**Figure S1.** Scanning electron microscopy images of electrosprayed (A) 4 % and (B) 6 % gelatine particles crosslinked with 37.5  $\mu\text{g/mL}$ , 62.5  $\mu\text{g/mL}$ , and 87.5  $\mu\text{g/mL}$  Glutaraldehyde (GA) and sprayed at flow rates 2  $\mu\text{L/min}$  and 4  $\mu\text{L/min}$ .

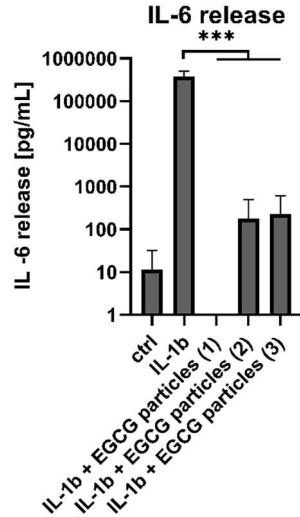

**Figure S2.** The release of IL-6 from disc cells cultured in 3D for seven days in the presence of 5 ng/mL IL-1 $\beta$  with and without EGCG microparticles (n = 3 repeats, t-test IL-1 $\beta$  vs. IL-1 $\beta$  + EGCG particles, \*p < 0.05, \*\* p < 0.01, \*\*\*p < 0.001).

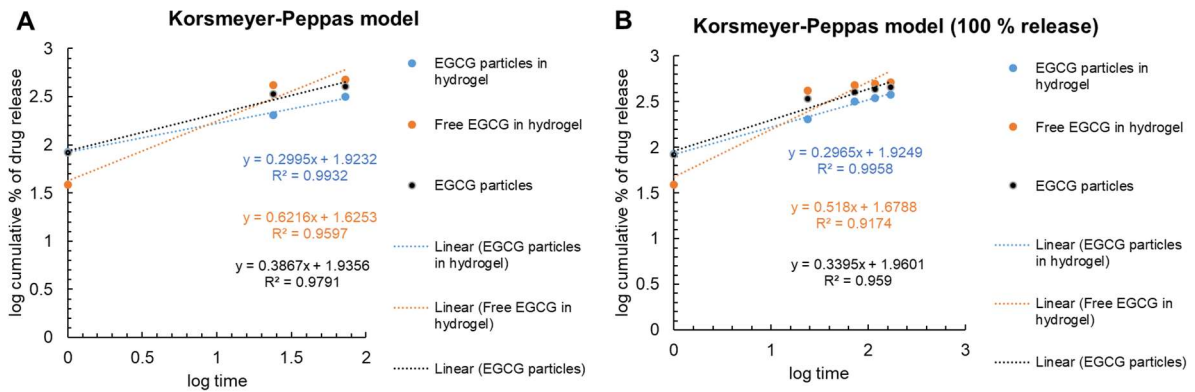

**Figure S3.** Kormsmeier-Peppas model of drug release kinetics. **(A)** First ~60–80% of EGCG release in each group was plotted as log cumulative % drug release vs. log time. Diffusion coefficient (n) was determined from the respective equations. **(B)** Kormsmeier-Peppas plot for 100% release was shown for comparison. Orange = free EGCG in hydrogel, blue = EGCG particles in hydrogel, black = EGCG particles.

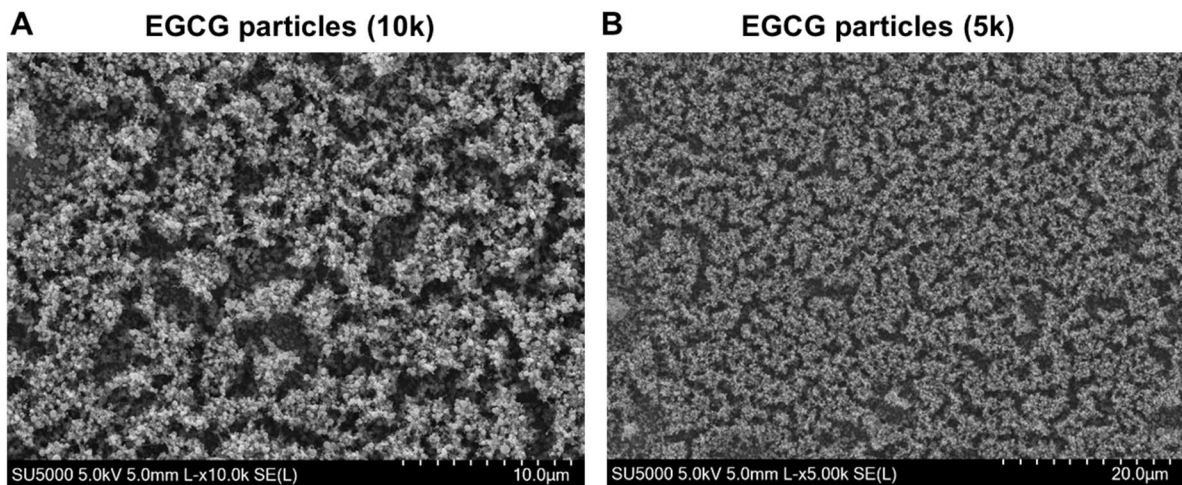

**Figure S4.** Representative SEM image of EGCG particles produced using NANOSPIDER™ technology in **(A)** 10k magnification and **(B)** 5k magnification.

**Table S1.** Examined electrospraying parameters (NANOSPIDER™ technology). Heated = the gelatine mix has been heated inside an Erlenmeyer flask attached to a reflux condenser by lowering the flask into an oil bath which was warmed by a heating plate to 110°C with 500 rpm. Cooled = the gelatine mix has been cooled to 4°C in the fridge.

| <b>Trial</b> | <b>Gelatine content (%)</b> | <b>Cylinder diameter (mm)</b> | <b>EMW speed (mm/s)</b> | <b>Electrode distance (mm)</b> | <b>Humidity (%)</b> | <b>Temperature (°C)</b> |
|--------------|-----------------------------|-------------------------------|-------------------------|--------------------------------|---------------------|-------------------------|
| 1            | 4                           | 0.7                           | 290                     | 250                            | 40                  | 20                      |
| 2            | 4                           | 0.5                           | 260                     | 200                            | 40                  | 20                      |
| 3            | 4                           | 0.5                           | 600                     | 200                            | 40                  | 20                      |
| 4            | 4                           | 0.7                           | 200                     | 200                            | 40                  | 15                      |
| 5            | 4                           | 0.7                           | 200                     | 200                            | 40                  | 5                       |
| 6            | 10                          | 0.5                           | 200                     | 250                            | 40                  | 11                      |
| 7            | 6                           | 0.5                           | 280                     | 250                            | 40                  | 11                      |
| 8            | 6                           | 0.5                           | 280                     | 250                            | 10                  | 10                      |
| 9            | 6                           | 0.5                           | 280                     | 250                            | 60                  | 10                      |
| 10           | 6                           | 0.5                           | 400                     | 250                            | 60                  | 10                      |
| 11           | 6                           | 0.5                           | 400                     | 250                            | 60                  | 20                      |
| 12           | 5 (heated 24h)              | 0.5                           | 400                     | 250                            | 40                  | 12                      |
| 13           | 5 (heated 48h)              | 0.5                           | 400                     | 250                            | 40                  | 12                      |
| 14           | 4.5                         | 0.5                           | 400                     | 250                            | 40                  | 12                      |
| 15           | 5 (cooled at 4°C)           | 0.5                           | 400                     | 250                            | 40                  | 12                      |
| 16           | 10 (heated 48h)             | 0.5                           | 400                     | 250                            | 40                  | 12                      |
| 17           | 7.5 (heated 48h)            | 0.5                           | 400                     | 250                            | 40                  | 12                      |
| 18           | 5 (no NaOH, Tween20)        | 0.5                           | 400                     | 250                            | 40                  | 12                      |
| 19           | 5 (Tween20)                 | 0.5                           | 400                     | 250                            | 40                  | 12                      |
| 20           | 10 (heated 36h, Tween20)    | 0.5                           | 400                     | 250                            | 40                  | 12                      |
